# Supplementary material
Source: MDPI journal article supplement (https://www.mdpi.com/2311-5637/5/1/6)
Supplement: s1 [file s1]

# Supplementary Materials

## 1. Supplementary method

### Lipid extraction

Cells in 25 mL cultures were harvested by centrifugation ( $4,470\times g$ ) at  $4\text{ }^{\circ}\text{C}$  for 5 min. Cell pellets were transferred in 2 mL screw-capped microcentrifuge tubes with  $\sim 250\text{ }\mu\text{L}$  425 - 600 $\mu\text{m}$  acid-washed glass beads (Sigma) and 1 mL methanol, 10  $\mu\text{L}$  10 mg heptadecanoic acid  $\text{mL}^{-1}$  (Alfa Aesar) was added as internal standard. The cells were lysed using the Disruptor Genie Cell Disruptor (Scientific Industries) twice for 6 minutes each time. The lysed cells (in 1 mL methanol) was transferred to a 50 mL centrifuge tube with 9 mL of methanol and incubated in a  $65\text{ }^{\circ}\text{C}$  water bath for 30 min and vortexed for 5 s every 10 min. Then 0.5 mL 10 M KOH was added, vortexed vigorously for about 1 min, and incubated at  $65\text{ }^{\circ}\text{C}$  for 2 h with 5 s vortexes every hour. After cooling to room temperature in a cold tap water bath, 0.5 mL concentrated  $\text{H}_2\text{SO}_4$  (18.4 M) was added and the same  $65\text{ }^{\circ}\text{C}$  incubation was repeated. After cooling to room temperature, 4 mL hexane was added to the tube and vortexed for 1 min to extract the lipids, then centrifuged at  $1,351\times g$  for 5 min. The top hexane layer was then transferred to a clean  $15\times 125\text{ mm}$  glass tube. This extraction step was repeated with another 4 mL hexane and the top hexane layer was transferred to the same glass tube. The extracted lipids were dried under nitrogen gas, and resuspended in 0.5 mL hexane for lipid composition analysis.

## 2. Supplementary tables

Table S1 Concentration of common components in normal YNB and synthetic seawater.

| Component                                | Concentration in YNB ( $\text{g L}^{-1}$ ) | Concentration in seawater ( $\text{g L}^{-1}$ ) |
|------------------------------------------|--------------------------------------------|-------------------------------------------------|
| NaCl                                     | 0.1                                        | 23.9                                            |
| $\text{Na}_2\text{SO}_4$                 | -                                          | 4                                               |
| $\text{MgSO}_4$                          | 0.5                                        | -                                               |
| $\text{MgCl}_2\cdot 6\text{H}_2\text{O}$ | -                                          | 10.8                                            |
| $\text{CaCl}_2\cdot 2\text{H}_2\text{O}$ | 0.1                                        | 1.5                                             |
| $\text{KH}_2\text{PO}_4$                 | 1                                          | -                                               |
| KI                                       | 0.0001                                     | -                                               |
| KCl                                      | -                                          | 0.7                                             |
| KBr                                      | -                                          | 0.1                                             |
| $\text{H}_3\text{BO}_3$                  | 0.0005                                     | -                                               |

Table S2 List of strains used.

| Name <sup>a</sup> | Description                                                                |
|-------------------|----------------------------------------------------------------------------|
| YLH2              | Unevolved ancestral strain (GSY1136 Yiplac211YB/I/E* $\Delta\text{CTT1}$ ) |
| SM14              | Isolated hyper-producer from evolved population 1                          |
| SM11              | Isolated hyper-producer from evolved population 1                          |
| SM12              | Isolated hyper-producer from evolved population 1                          |
| SM13              | Isolated hyper-producer from evolved population 1                          |
| SM22              | Isolated hyper-producer from evolved population 2                          |
| SM24              | Isolated hyper-producer from evolved population 2                          |

<sup>a</sup>Strains used in this work were from our previous work [1].

Table S3 Highest  $\beta$ -carotene production in different conditions.

| Strains and conditions                                                                                                        | $\beta$ -carotene production (mg g <sup>-1</sup> DCW) | Reference |
|-------------------------------------------------------------------------------------------------------------------------------|-------------------------------------------------------|-----------|
| <i>Saccharomyces cerevisiae</i> SM14 in nutrient reduced media made with water, cultured in shaking incubator                 | 8.25 $\pm$ 0.51                                       | This work |
| <i>Saccharomyces cerevisiae</i> SM14 in nutrient reduced media made with 1/3 $\times$ seawater, cultured in shaking incubator | 17.37 $\pm$ 1.12                                      | This work |
| <i>Saccharomyces cerevisiae</i> SM14 in YPD media, cultured in shaking incubator                                              | 18                                                    | [1]       |
| <i>Saccharomyces cerevisiae</i> SM14 in YNB media, cultured in bioreactor                                                     | 25.52 $\pm$ 2.15                                      | [2]       |
| <i>Saccharomyces cerevisiae</i> YB/I/E in YNB media, cultured in shaking incubator                                            | 5.9                                                   | [3]       |
| <i>Rhodotorula glutinis</i> NCIM 3353 in YNB media, cultured in shaking incubator                                             | 5.38                                                  | [4]       |

Table S4 Comparison of  $\beta$ -carotene measurement between spectrophotometric assay and HPLC.

| Samples | spectrophotometric assay (mg L <sup>-1</sup> ) | HPLC (mg L <sup>-1</sup> ) |
|---------|------------------------------------------------|----------------------------|
| 1       | 3.87                                           | 3.27                       |
| 2       | 1.41                                           | 0.91                       |

### 3. Supplementary figures

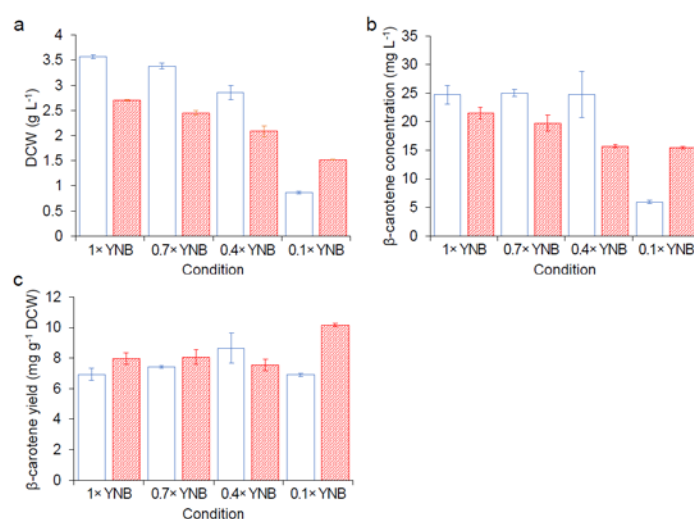

**Figure S1** Effect of YNB concentration on biomass formation and  $\beta$ -carotene production of SM14 in freshwater (□) and seawater (▨) after 72 h incubation. (a) Biomass (DCW: dry cell weight). (b)  $\beta$ -carotene concentration. (c)  $\beta$ -carotene yield. Error bars are standard deviations.

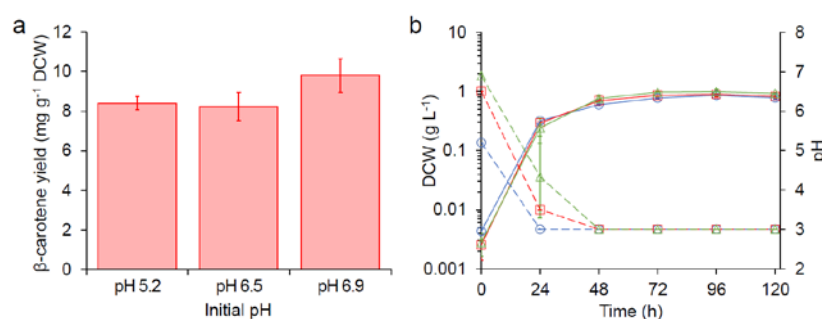

**Figure S2**  $\beta$ -carotene production after 120 h (a), cell growth (solid lines) (DCW: dry cell weight) and pH change (dashed lines) (b) of SM14 in freshwater with different initial pH, (○) initial pH 5.2, (□) initial pH 6.5, (△) initial pH 6.9. Error bars are standard deviations

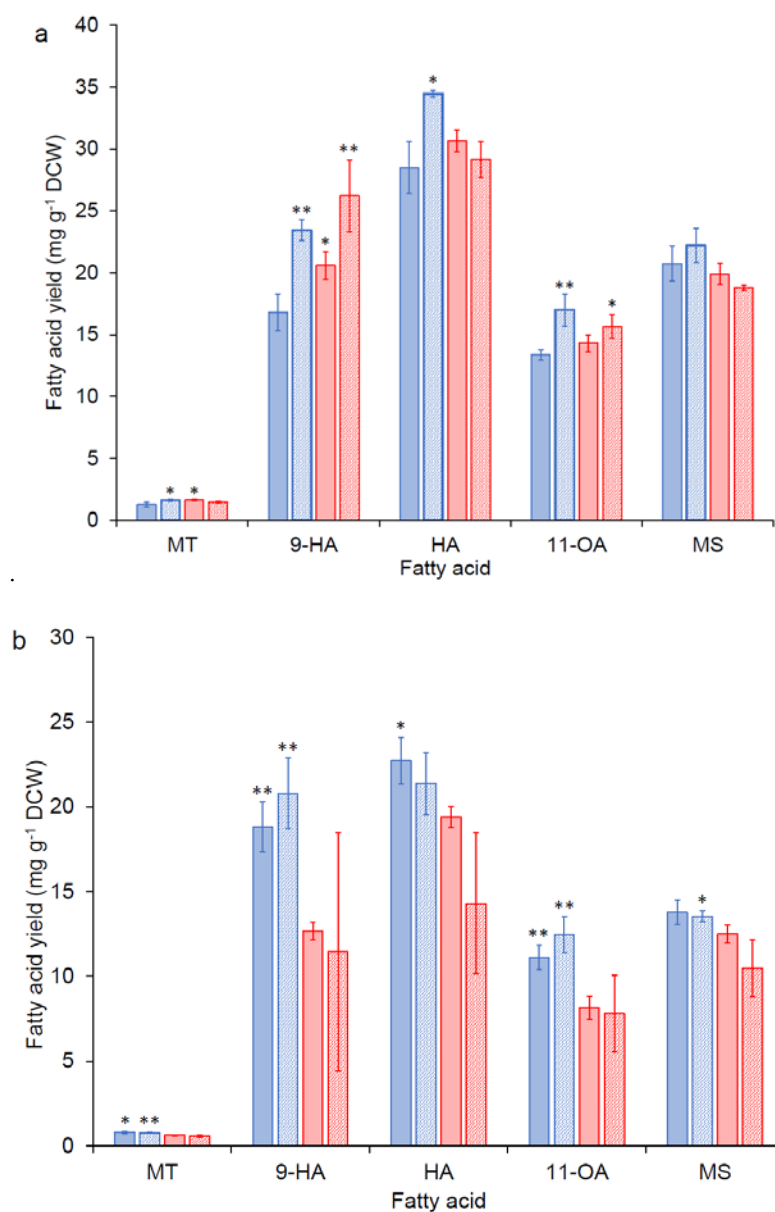

**Figure S3** Individual fatty acid yield. (a) (□) C:N = 8.8 in freshwater, (▨) C:N = 50 in freshwater, (□) C:N = 8.8 in freshwater with 0.05 M NaCl, (▨) C:N = 50 in freshwater with 0.05 M NaCl; (b) (□) C:N = 8.8 in 1/3× seawater, (▨) C:N = 50 in 1/3× seawater, (□) C:N = 8.8 in seawater, (▨) C:N = 50 in seawater. Error bars are standard deviations. \*: Statistically significantly different from C:N = 8.8 in freshwater (a) or seawater (b) (\* $p$ -value < 0.05, \*\* $p$ -value < 0.01). MT: Methyl tetradecanoate; 9-HA: 9-Hexadecenoic acid; HA: Hexadecanoic acid; 11-OA: 11-Octadecenoic acid; MS: Methyl stearate.

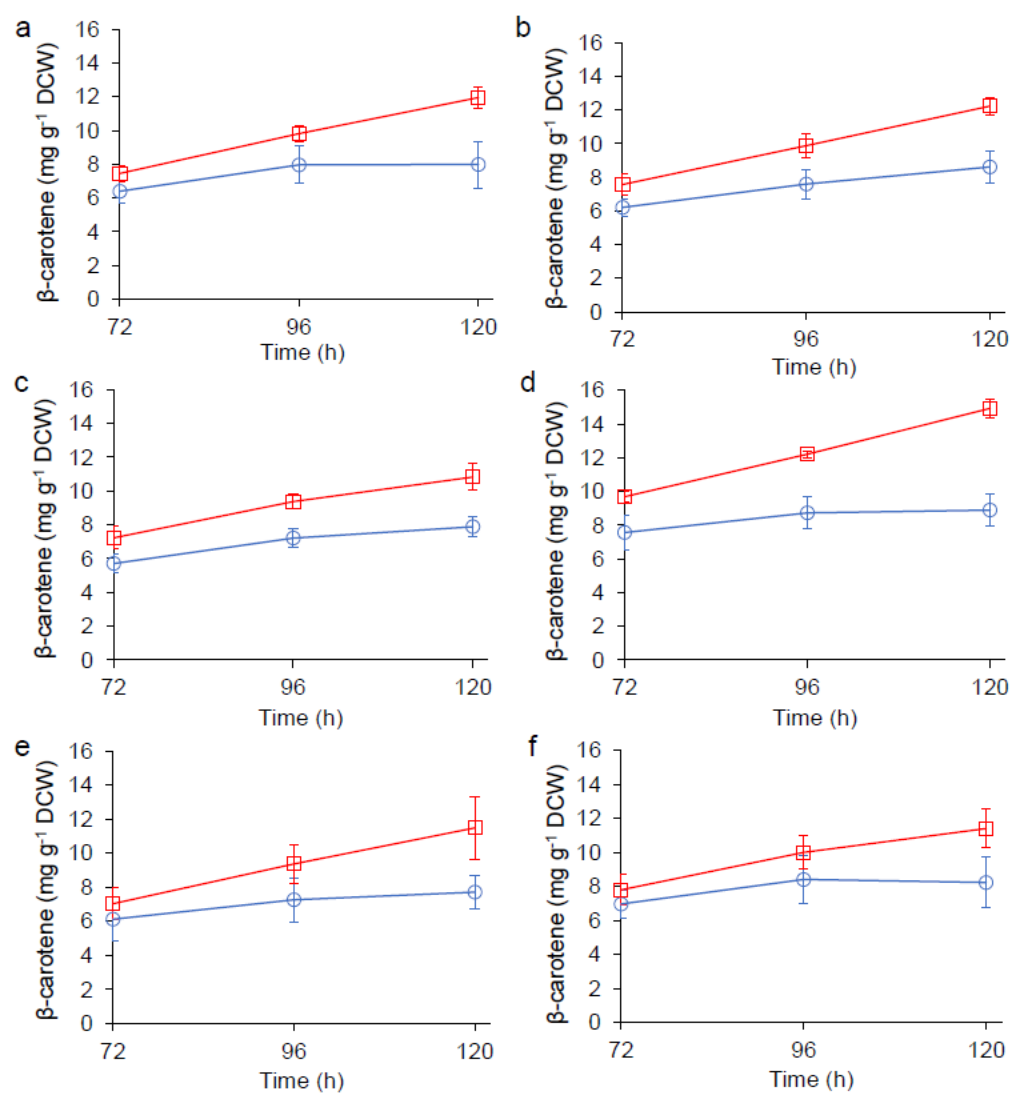

**Figure S4** β-carotene production of carotenogenic strains in 0.1× YNB with freshwater (●) or 1/3× seawater (■). (a) SM11. (b) SM12. (c) SM13. (d) SM22. (e) SM24. (f) YLH2. Error bars are standard deviations.

## Reference

1. Reyes, L.H.; Gomez, J.M.; Kao, K.C. Improving carotenoids production in yeast via adaptive laboratory evolution. *Metab Eng* **2014**, *21*, 26-33.
2. Olson, M.L.; Johnson, J.; Carswell, W.F.; Reyes, L.H.; Senger, R.S.; Kao, K.C. Characterization of an evolved carotenoids hyper-producer of *Saccharomyces cerevisiae* through bioreactor parameter optimization and raman spectroscopy. *J Ind Microbiol Biotechnol* **2016**, *43*, 1355-1363.
3. Verwaal, R.; Wang, J.; Meijnen, J.P.; Visser, H.; Sandmann, G.; van den Berg, J.A.; van Ooyen, A.J. High-level production of beta-carotene in *Saccharomyces cerevisiae* by successive transformation with carotenogenic genes from *Xanthophyllomyces dendrorhous*. *Appl Environ Microbiol* **2007**, *73*, 4342-4350.
4. Bhosale, P.; Gadre, R.V. Production of beta-carotene by a *Rhodotorula glutinis* mutant in sea water medium. *Bioresour Technol* **2001**, *76*, 53-55.
